# Supplementary material for: Proteinase-activated receptor 2 promotes TGF-β-dependent cell motility in pancreatic cancer cells by sustaining expression of the TGF-β type I receptor ALK5
Source: PubMed Central journal article supplement (PMC5173045; doi:10.18632/oncotarget.9600), 2016-05-27
Supplement: oncotarget-07-41095-s001.pdf [file oncotarget-07-41095-s001.pdf]

# Proteinase-activated receptor 2 promotes TGF- $\beta$ -dependent cell motility in pancreatic cancer cells by sustaining expression of the TGF- $\beta$ type I receptor ALK5

## Supplementary Material

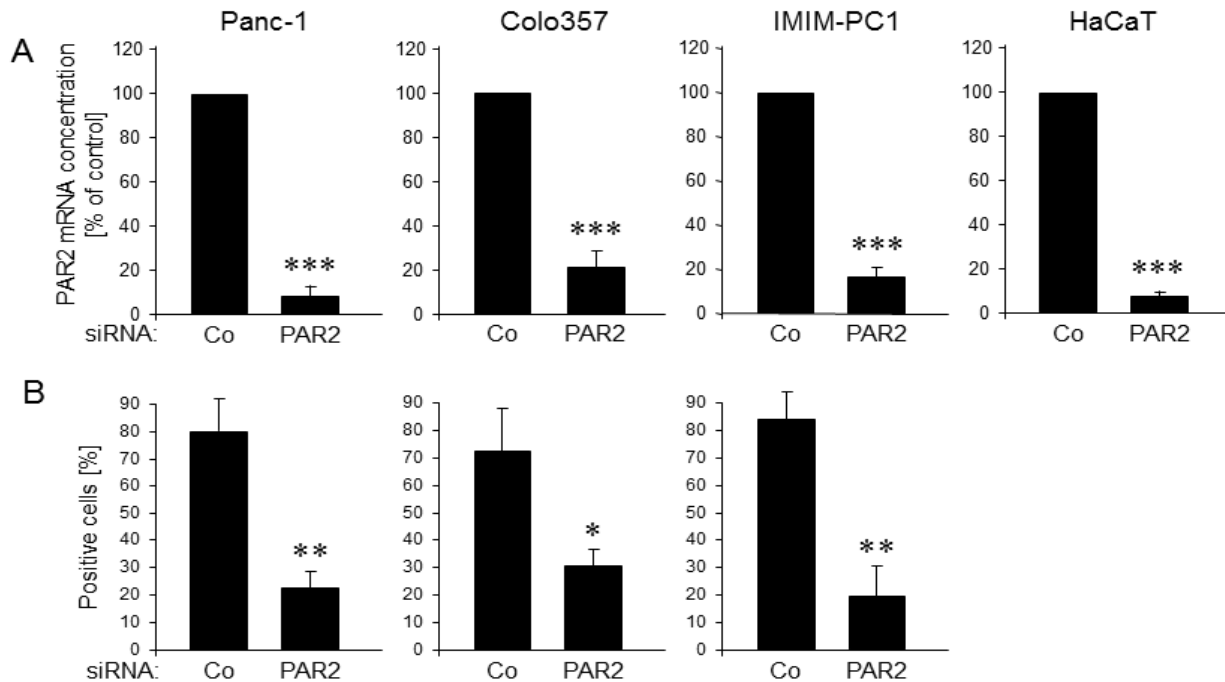

**Supplementary Figure 1: Verification of successful siRNA-mediated silencing of *F2RL1* in the indicated cell lines.** A, qPCR detection of PAR2 mRNA in PAR2 siRNA-transfected cells. Cells were transiently transfected twice with Lipofectamine RNAiMAX and either scrambled negative control siRNA (Co) or a mix of three specific PAR2 siRNAs (PAR2). Forty-eight h after the first transfection, cells were subjected to RNA isolation and qPCR analysis with PAR2-specific primers. Data (mean  $\pm$  SD from 3 parallel wells) were plotted in relation to those for controls set arbitrarily at 100%. B, Flow cytometry determination of surface-associated PAR2 protein following siRNA-mediated silencing of *F2RL1*. Cells were transfected as described in A and 48 h after the first transfection were subjected to flow cytometry analysis with PAR2-specific antibody as outlined in Materials and Methods. Data represent the mean  $\pm$  SD, n = 3. \*, p < 0.05; \*\*, p < 0.01; \*\*\*, p < 0.001, unpaired, two-tailed Student's *t*-test.

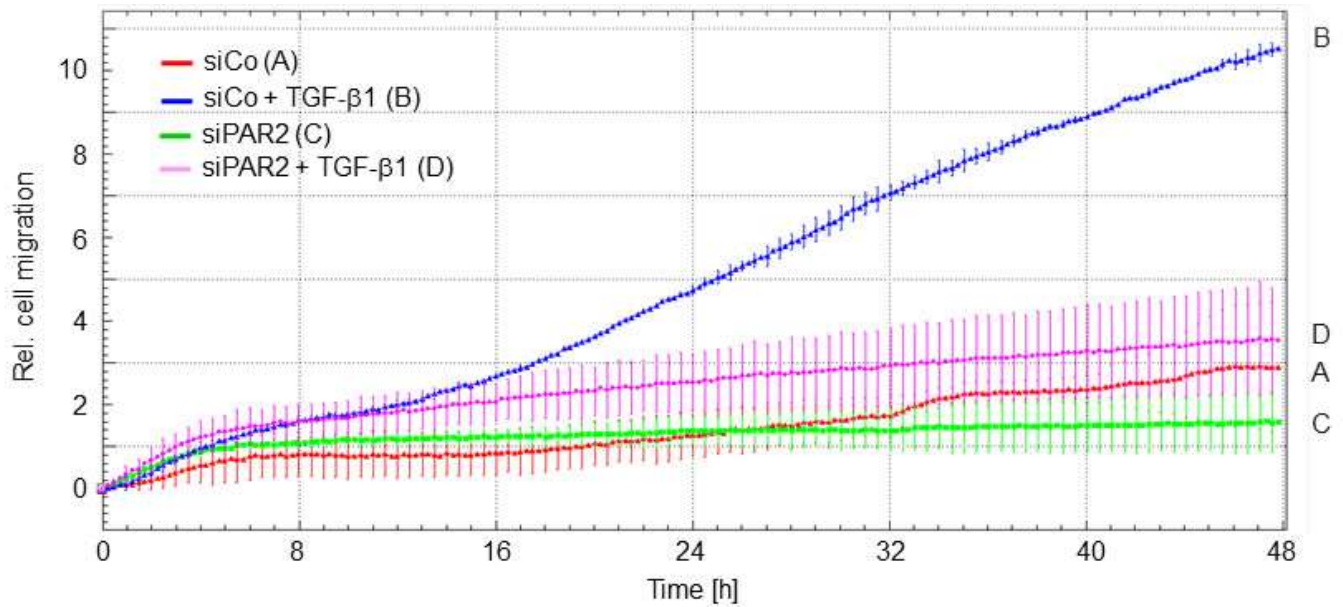

**Supplementary Figure 2: siRNA-mediated depletion of PAR2 suppresses TGF-β1-induced cell migration in HaCaT cells.** Real-time measurement of cell migration in HaCaT cells transiently transfected with scrambled control siRNA (siCo) or PAR2 siRNA (siPAR2) and treated or not with TGF-β1. Data were derived from 3 parallel wells and represent the mean ± SD. One representative assay of 2 assays performed in total is shown. Data were significant between siCo+TGF-β1 (blue curve/B) and siPAR2+TGF-β1 (magenta curve/D) at 20:00 and all later time points. Letters on the graph's right-hand side allow for colour-independent identification of the curves.

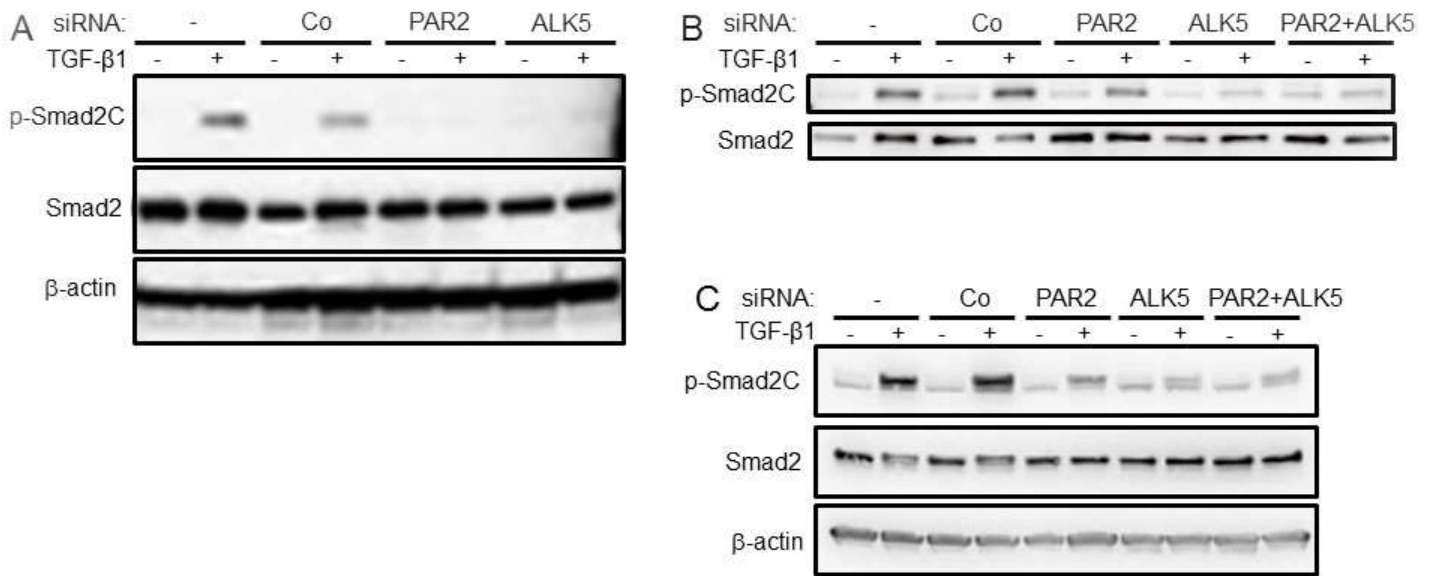

**Supplementary Figure 3: Effect of *F2RL1* silencing on TGF-β1-induced phosphorylation of Smad2C in PDAC-derived cell lines.** Panc-1 (A), Colo357 (B), and IMIM-PC1 (C) cells were transiently transfected twice with Lipofectamine (LFA) RNAiMAX alone (-) or LFA with 50 nM of either scrambled negative control siRNA (Co), a mix of three specific siRNAs for PAR2, ALK5 or PAR2+ALK5 as indicated. Forty-eight h after the first transfection, cells were subjected to a 1-h treatment with 5 ng/ml TGF-β1 followed by immunoblotting for p-Smad2C, and Smad2 and β-actin as loading control. Representative immunoblots from two independent experiments are shown.

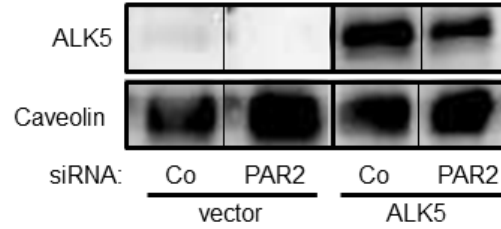

**Supplementary Figure 4: Ectopically expressed ALK5 is cell membrane-associated.** Panc-1 cells were transfected twice on two consecutive days with 50 nM of control (Co) or PAR2 siRNA, as indicated, using Lipofectamine 2000. For the second transfection, the transfection mix was supplemented with either an expression vector encoding wild-type ALK5 (ALK5) or empty vector (vector) as control. Forty-eight h after the second round of transfection, cells were lysed and subjected to membrane fractionation protocol as outlined in Material and Methods and subsequently analysed by immunoblotting for ALK5 and the integral membrane protein caveolin. One representative experiment out of three experiments performed in total is shown. Data are from the same blot and irrelevant lanes have been removed (indicated by the thin lines).

**Supplementary Table 1: Primers used for qPCR**

| Primer name     | Sequence (5'→3')                                                                       | Expected size (base pairs) | GenBank accession |
|-----------------|----------------------------------------------------------------------------------------|----------------------------|-------------------|
| ALK5-forward    | GCGACGGCGTTACAGTGTTTCTGC                                                               | 378                        | NM_004612         |
| ALK5-reverse    | ATGGTGAATGACAGTGCGGTTGTGG                                                              | 378                        | NM_004612         |
| β-actin-forward | GACGAGGCCAGAGCAAGAG                                                                    | 785                        | NM_001101         |
| β-actin-reverse | ATCTCTTCTGCATCCTGTC                                                                    | 785                        | NM_001101         |
| GADD45β-forward | AACATGACGCTGGAAGAGCTCG                                                                 | 490                        | NM_015675         |
| GADD45β-reverse | CTCAGCGTTCCTGAAGAGAGATG                                                                | 490                        | NM_015675         |
| GAPDH-forward   | TTGCCATCAATGACCCCTTCA                                                                  | 174                        | NM_001289745.1    |
| GAPDH-reverse   | CGCCCCACTTGATTTTGGGA                                                                   | 174                        | NM_001289745.1    |
| mGAPDH          | Mm99999915_g1 Gapdh FAM, TaqMan Gene Expression Assay (ABI / ThermoFisher Scientific)  |                            | NM_008084.3       |
| MMP2-forward    | CACCCTGGAGCGAGGGTAC                                                                    | 465                        | NM_004530.5       |
| MMP2-reverse    | CTGATTAGCTGTAGAGCTGAAGGC                                                               | 465                        | NM_004530.5       |
| MMP9-forward    | CATTCGACGATGACGAGTTGT                                                                  | 230                        | NM_004994         |
| MMP9-reverse    | CGGGTGTAGAGTCTCTCGC                                                                    | 230                        | NM_004994         |
| PAI-1-forward   | CTTCTCAGGCTGTTCCGGAGC                                                                  | 808                        | X04744            |
| PAI-1-reverse   | GGGTCAGGGTTCATCACTTGG                                                                  | 808                        | X04744            |
| mPAI-1          | Mm00435858_m1 Serbp1 FAM, TaqMan Gene Expression Assay (ABI / ThermoFisher Scientific) |                            | NM_008871.2       |
| Smad7-forward   | GGAAGATCAACCCCGAGCTG                                                                   | 200                        | NM_005904         |
| Smad7-reverse   | TTGGGAATCTGAAAGCCCC                                                                    | 200                        | NM_005904         |
| PAR1-forward    | TGTGTACACGGAGTGTGTTGTAG                                                                | 264                        | NM_001992         |
| PAR1-reverse    | ACTGTCATGAGCAAGATAGAGGC                                                                | 264                        | NM_001992         |
| PAR2-forward    | ACTCCAGGAAGAAGGCAAACA                                                                  | 98                         | NM_005242         |
| PAR2-reverse    | TGGTCTGCTTCACGACATACA                                                                  | 98                         | NM_005242         |
| TBP-forward     | GCTGGCCCATAGTGATCTTT                                                                   | 60                         | M55654.1          |
| TBP-reverse     | CTTCACACGCCAAGAAACAG                                                                   | 60                         | M55654.1          |

**Supplementary Table 2: siRNAs used for cell transfection**

| siRNA                             | Supplier   | Cat. #                              | Sequence                                                                            | GenBank accession |
|-----------------------------------|------------|-------------------------------------|-------------------------------------------------------------------------------------|-------------------|
| ALK5                              | Invitrogen | HSS110695<br>HSS110696<br>HSS110697 | GCAUCUCACUCAUGUUGAUGGUCUA<br>GCCAAAUGAAGAGGACCCUUCAUUA<br>GGAGAAGAAGUUGCUGUUAAGAUAU | NM_004612         |
| PAR1                              | Invitrogen | HSS103468<br>HSS176655<br>HSS176656 | GCUGAUCAUUCCACGGUCUGUUAU<br>GAAUACAGAUUAGUCUCCAUAUA<br>UGUUUGUAGUCAGCCUCCACUAAA     | NM_001992         |
| PAR2                              | Invitrogen | HSS103471<br>HSS103472<br>HSS103473 | UCAACCACUGUUAAGACCUCCUAUU<br>GGGAAGCUCUUUGUAAUGUGCUUUAU<br>GCAACAUGUACUGUCCAUUCUCUU | NM_005242         |
| Stealth™ RNAi<br>Negative Control | Invitrogen | 12935-200                           |                                                                                     |                   |

**Supplementary Table 3: Reporter genes and expression plasmids used for cell transfection**

| Plasmid                       | Supplier                                         | Cat. #  | Vector (Supplier)                             | Ref./GenBank accession |
|-------------------------------|--------------------------------------------------|---------|-----------------------------------------------|------------------------|
| p6SBE-luc                     | S. E. Kern, Baltimore, MD                        |         | pGL3-Promoter (Promega)                       | Ref. 1 <sup>a</sup>    |
| p(CAGA) <sub>12</sub> MLP-Luc | S. Dooley, Mannheim, Germany                     |         | pGL2 (Promega)                                | Ref. 2 <sup>b</sup>    |
| p3TP-Lux                      | J. Massagué, NY                                  |         | pGL2-Basic (Promega)                          | Ref. 3 <sup>c</sup>    |
| pRL-TK-Luc                    | Promega, Heidelberg, Germany                     | E2241   | pRL <i>Renilla</i> Luciferase Reporter Vector |                        |
| PAR2-HA                       | S. Compton, Cottingham, UK                       |         | pcDNA3.1(-)                                   | NM_005242              |
| ALK5-HA                       | MRC-PPU Reagents, University of Dundee, Scotland | DU33064 | pCMV5                                         | NM_004612              |
| ALK5-T204D-HA                 | J. Massagué, NY                                  |         | pCMV5                                         | NM_004612              |
| RlmL45-T204D-FLAG             | Y. E. Zhang, Bethesda, MD                        |         | pCMV5                                         | NM_004612              |

<sup>a</sup>Ref. 1: Zawel L, Dai JL, Buckhaults P, Zhou S, Kinzler KW, Vogelstein B, Kern SE. Human Smad3 and Smad4 are sequence-specific transcription activators. *Mol Cell*. 1998; 1:611-617.

<sup>b</sup>Ref. 2: Dennler S, Itoh S, Vivien D, ten Dijke P, Huet S, Gauthier JM. Direct binding of Smad3 and Smad4 to critical TGF beta-inducible elements in the promoter of human plasminogen activator inhibitor-type 1 gene. *EMBO J*. 1998; 17:3091-3100.

<sup>c</sup>Ref. 3: Wrana JL, Attisano L, Cárcamo J, Zentella A, Doody J, Laiho M, Wang XF, Massagué J. TGF beta signals through a heteromeric protein kinase receptor complex. *Cell*. 1992; 71:1003-1014.
